# Supplementary material for: Anatomical Evaluation of Rat and Mouse Simulators for Laboratory Animal Science Courses
Source: MDPI journal article supplement (doi:10.3390/ani11123432), 2021-12-01
Supplement: s1 [file s1]

## Important Note on Data Protection

**Your participation in the survey is voluntary. The survey data will be stored and administered anonymously. It is not possible to draw any conclusions about your participation. All data is managed in strict compliance with current data protection guidelines. Only project members have access to the data and are bound to secrecy. Under no circumstances will data be passed on to third parties. The data will only be used for research purposes. You can cancel the survey at any time without giving reasons.**

# SimulRATor-Project:

## Anatomic Evaluation – Questionnaire A

ID: \_\_\_\_\_

### Rat simulator A

#### 1. How realistic are the following characteristics of rat simulator A in comparison to a live rat?

|                                   | Very realistic        | Quite realistic       | Rather realistic      | Rather unrealistic    | Quite unrealistic     | Very unrealistic      | Not applicable        |
|-----------------------------------|-----------------------|-----------------------|-----------------------|-----------------------|-----------------------|-----------------------|-----------------------|
| Characteristics                   | 1                     | 2                     | 3                     | 4                     | 5                     | 6                     | -99                   |
| Overall appearance                | <input type="radio"/> |
| Haptics                           | <input type="radio"/> |
| Mobility of the skin on the neck  | <input type="radio"/> |
| Mobility of the skin on the flank | <input type="radio"/> |
| Skin texture                      | <input type="radio"/> |
| Body size                         | <input type="radio"/> |
| Body weight                       | <input type="radio"/> |
| Body shape                        | <input type="radio"/> |
| Proportions                       | <input type="radio"/> |

|                                  | Very realistic<br>1   | Quite realistic<br>2  | Rather realistic<br>3 | Rather unrealistic<br>4 | Quite unrealistic<br>5 | Very unrealistic<br>6 | Not applicable<br>-99 |
|----------------------------------|-----------------------|-----------------------|-----------------------|-------------------------|------------------------|-----------------------|-----------------------|
| <b>Characteristics</b>           |                       |                       |                       |                         |                        |                       |                       |
| Gender-specific characteristics  | <input type="radio"/> | <input type="radio"/> | <input type="radio"/> | <input type="radio"/>   | <input type="radio"/>  | <input type="radio"/> | <input type="radio"/> |
| Blood vessels                    | <input type="radio"/> | <input type="radio"/> | <input type="radio"/> | <input type="radio"/>   | <input type="radio"/>  | <input type="radio"/> | <input type="radio"/> |
| Position of the blood vessels    | <input type="radio"/> | <input type="radio"/> | <input type="radio"/> | <input type="radio"/>   | <input type="radio"/>  | <input type="radio"/> | <input type="radio"/> |
| Course of the blood vessels      | <input type="radio"/> | <input type="radio"/> | <input type="radio"/> | <input type="radio"/>   | <input type="radio"/>  | <input type="radio"/> | <input type="radio"/> |
| Consistency of the blood vessels | <input type="radio"/> | <input type="radio"/> | <input type="radio"/> | <input type="radio"/>   | <input type="radio"/>  | <input type="radio"/> | <input type="radio"/> |
| Mobility of joints               | <input type="radio"/> | <input type="radio"/> | <input type="radio"/> | <input type="radio"/>   | <input type="radio"/>  | <input type="radio"/> | <input type="radio"/> |

| <b>2. How realistic are the following characteristics on <u>the head</u> of the rat simulator A in comparison to a live rat?</b> |                       |                       |                       |                         |                        |                       |                       |
|----------------------------------------------------------------------------------------------------------------------------------|-----------------------|-----------------------|-----------------------|-------------------------|------------------------|-----------------------|-----------------------|
|                                                                                                                                  | Very realistic<br>1   | Quite realistic<br>2  | Rather realistic<br>3 | Rather unrealistic<br>4 | Quite unrealistic<br>5 | Very unrealistic<br>6 | Not applicable<br>-99 |
| <b>Characteristics</b>                                                                                                           |                       |                       |                       |                         |                        |                       |                       |
| Overall appearance of the head                                                                                                   | <input type="radio"/> | <input type="radio"/> | <input type="radio"/> | <input type="radio"/>   | <input type="radio"/>  | <input type="radio"/> | <input type="radio"/> |
| Head shape                                                                                                                       | <input type="radio"/> | <input type="radio"/> | <input type="radio"/> | <input type="radio"/>   | <input type="radio"/>  | <input type="radio"/> | <input type="radio"/> |
| Head proportions                                                                                                                 | <input type="radio"/> | <input type="radio"/> | <input type="radio"/> | <input type="radio"/>   | <input type="radio"/>  | <input type="radio"/> | <input type="radio"/> |
| Mobility of the head                                                                                                             | <input type="radio"/> | <input type="radio"/> | <input type="radio"/> | <input type="radio"/>   | <input type="radio"/>  | <input type="radio"/> | <input type="radio"/> |
| Mobility of the lower jaw                                                                                                        | <input type="radio"/> | <input type="radio"/> | <input type="radio"/> | <input type="radio"/>   | <input type="radio"/>  | <input type="radio"/> | <input type="radio"/> |
| Degree of mouth opening                                                                                                          | <input type="radio"/> | <input type="radio"/> | <input type="radio"/> | <input type="radio"/>   | <input type="radio"/>  | <input type="radio"/> | <input type="radio"/> |
| Appearance of the mouth opening                                                                                                  | <input type="radio"/> | <input type="radio"/> | <input type="radio"/> | <input type="radio"/>   | <input type="radio"/>  | <input type="radio"/> | <input type="radio"/> |
| Pharynx and larynx region                                                                                                        | <input type="radio"/> | <input type="radio"/> | <input type="radio"/> | <input type="radio"/>   | <input type="radio"/>  | <input type="radio"/> | <input type="radio"/> |

|                 | 1<br>Very realistic   | 2<br>Quite realistic  | 3<br>Rather realistic | 4<br>Rather<br>unrealistic | 5<br>Quite<br>unrealistic | 6<br>Very<br>unrealistic | Not applicable        |
|-----------------|-----------------------|-----------------------|-----------------------|----------------------------|---------------------------|--------------------------|-----------------------|
| Characteristics | 1                     | 2                     | 3                     | 4                          | 5                         | 6                        | -99                   |
| Teeth           | <input type="radio"/> | <input type="radio"/> | <input type="radio"/> | <input type="radio"/>      | <input type="radio"/>     | <input type="radio"/>    | <input type="radio"/> |
| Tongue          | <input type="radio"/> | <input type="radio"/> | <input type="radio"/> | <input type="radio"/>      | <input type="radio"/>     | <input type="radio"/>    | <input type="radio"/> |
| Eyes            | <input type="radio"/> | <input type="radio"/> | <input type="radio"/> | <input type="radio"/>      | <input type="radio"/>     | <input type="radio"/>    | <input type="radio"/> |
| Ears            | <input type="radio"/> | <input type="radio"/> | <input type="radio"/> | <input type="radio"/>      | <input type="radio"/>     | <input type="radio"/>    | <input type="radio"/> |

| 3. How realistic are the following characteristics on <u>the tail</u> of the Rat simulator A in comparison to a live rat? |                       |                       |                       |                            |                           |                          |                       |
|---------------------------------------------------------------------------------------------------------------------------|-----------------------|-----------------------|-----------------------|----------------------------|---------------------------|--------------------------|-----------------------|
|                                                                                                                           | 1<br>Very realistic   | 2<br>Quite realistic  | 3<br>Rather realistic | 4<br>Rather<br>unrealistic | 5<br>Quite<br>unrealistic | 6<br>Very<br>unrealistic | Not applicable        |
| Characteristics                                                                                                           | 1                     | 2                     | 3                     | 4                          | 5                         | 6                        | -99                   |
| Overall appearance of the tail                                                                                            | <input type="radio"/> | <input type="radio"/> | <input type="radio"/> | <input type="radio"/>      | <input type="radio"/>     | <input type="radio"/>    | <input type="radio"/> |
| Haptic of the tail                                                                                                        | <input type="radio"/> | <input type="radio"/> | <input type="radio"/> | <input type="radio"/>      | <input type="radio"/>     | <input type="radio"/>    | <input type="radio"/> |
| Mobility of the tail                                                                                                      | <input type="radio"/> | <input type="radio"/> | <input type="radio"/> | <input type="radio"/>      | <input type="radio"/>     | <input type="radio"/>    | <input type="radio"/> |
| Skin texture                                                                                                              | <input type="radio"/> | <input type="radio"/> | <input type="radio"/> | <input type="radio"/>      | <input type="radio"/>     | <input type="radio"/>    | <input type="radio"/> |
| Length of the tail                                                                                                        | <input type="radio"/> | <input type="radio"/> | <input type="radio"/> | <input type="radio"/>      | <input type="radio"/>     | <input type="radio"/>    | <input type="radio"/> |
| Connection to the trunk / torso                                                                                           | <input type="radio"/> | <input type="radio"/> | <input type="radio"/> | <input type="radio"/>      | <input type="radio"/>     | <input type="radio"/>    | <input type="radio"/> |
| Position of the tail blood vessels                                                                                        | <input type="radio"/> | <input type="radio"/> | <input type="radio"/> | <input type="radio"/>      | <input type="radio"/>     | <input type="radio"/>    | <input type="radio"/> |
| Course of the tail's blood vessels                                                                                        | <input type="radio"/> | <input type="radio"/> | <input type="radio"/> | <input type="radio"/>      | <input type="radio"/>     | <input type="radio"/>    | <input type="radio"/> |
| Quality of the tail's blood vessels                                                                                       | <input type="radio"/> | <input type="radio"/> | <input type="radio"/> | <input type="radio"/>      | <input type="radio"/>     | <input type="radio"/>    | <input type="radio"/> |
| Size of the tail's blood vessels                                                                                          | <input type="radio"/> | <input type="radio"/> | <input type="radio"/> | <input type="radio"/>      | <input type="radio"/>     | <input type="radio"/>    | <input type="radio"/> |
| Visibility of the blood vessels through the skin                                                                          | <input type="radio"/> | <input type="radio"/> | <input type="radio"/> | <input type="radio"/>      | <input type="radio"/>     | <input type="radio"/>    | <input type="radio"/> |

**4. How realistic are the following characteristics on the limbs of rat simulator A in comparison to a live rat?**

| Characteristics                 | Very realistic        | Quite realistic       | Rather realistic      | Rather <u>un</u> realistic | Quite <u>un</u> realistic | Very <u>un</u> realistic | Not applicable        |
|---------------------------------|-----------------------|-----------------------|-----------------------|----------------------------|---------------------------|--------------------------|-----------------------|
|                                 | 1                     | 2                     | 3                     | 4                          | 5                         | 6                        | -99                   |
| Overall appearance of the limbs | <input type="radio"/> | <input type="radio"/> | <input type="radio"/> | <input type="radio"/>      | <input type="radio"/>     | <input type="radio"/>    | <input type="radio"/> |
| Haptic of the limbs             | <input type="radio"/> | <input type="radio"/> | <input type="radio"/> | <input type="radio"/>      | <input type="radio"/>     | <input type="radio"/>    | <input type="radio"/> |
| Proportions of the limbs        | <input type="radio"/> | <input type="radio"/> | <input type="radio"/> | <input type="radio"/>      | <input type="radio"/>     | <input type="radio"/>    | <input type="radio"/> |
| Posture of the limbs            | <input type="radio"/> | <input type="radio"/> | <input type="radio"/> | <input type="radio"/>      | <input type="radio"/>     | <input type="radio"/>    | <input type="radio"/> |
| Mobility of the limbs           | <input type="radio"/> | <input type="radio"/> | <input type="radio"/> | <input type="radio"/>      | <input type="radio"/>     | <input type="radio"/>    | <input type="radio"/> |
| Length of the limbs             | <input type="radio"/> | <input type="radio"/> | <input type="radio"/> | <input type="radio"/>      | <input type="radio"/>     | <input type="radio"/>    | <input type="radio"/> |
| Toes on the limbs               | <input type="radio"/> | <input type="radio"/> | <input type="radio"/> | <input type="radio"/>      | <input type="radio"/>     | <input type="radio"/>    | <input type="radio"/> |

**5. From an anatomical point of view, what did you particularly like about rat simulator A?**

**6. From an anatomical point of view, what did you particularly dislike about rat simulator A?**

7. What would you improve from an anatomical point of view in rat simulator A?
